# Supplementary material
Source: PubMed Central journal article supplement (PMC4399771)
Supplement: 2014-001RBrownSupplementaryTable1.pdf [file 2014-001RBrownSupplementaryTable1.pdf]

[Supplementary online-only material for Brown TR, Slee A: Randomized placebo-controlled trial of duloxetine for central pain in multiple sclerosis. *Int J MS Care*. 2015;17(2):83–89.]

**Supplementary Table 1. Change from baseline to week 6 in primary and secondary endpoints**

| Population <sup>a</sup>                                                             | Duloxetine |               | Placebo |               | P value <sup>b</sup> |
|-------------------------------------------------------------------------------------|------------|---------------|---------|---------------|----------------------|
|                                                                                     | n          | Mean (SD)     | n       | Mean (SD)     |                      |
| Percent change in worst pain score                                                  |            |               |         |               |                      |
| Per-protocol                                                                        | 14         | -29.1 (20.41) | 18      | -11.5 (18.18) | .016 <sup>c</sup>    |
| ITT observed (complete cases)                                                       | 14         | -29.1 (20.41) | 19      | -10.9 (17.87) | .011 <sup>c</sup>    |
| ITT - missing imputed as placebo mean (-10.9)                                       | 18         | -25.0 (19.46) | 20      | -10.9 (17.39) | .024 <sup>c</sup>    |
| ITT - missing imputed as worst observed (+40.1)                                     | 18         | -13.7 (34.54) | 20      | -8.38 (20.80) | .564                 |
| ITT reduction in worst pain >30% - missing imputed as no reduction >30% - No. (%)   |            | 6 (33.3)      |         | 2 (10.0)      | .117                 |
| Percent change in average pain score                                                |            |               |         |               |                      |
| Per-protocol                                                                        | 14         | -38.5 (29.10) | 18      | -10.4 (18.85) | .002 <sup>c</sup>    |
| ITT observed (complete cases)                                                       | 14         | -38.5 (29.10) | 19      | -9.84 (18.47) | .002 <sup>c</sup>    |
| ITT - missing imputed as placebo mean (-9.8)                                        | 17         | -33.4 (28.55) | 20      | -9.84 (17.98) | .004 <sup>c</sup>    |
| ITT - missing imputed as worst observed (+19.9)                                     | 17         | -28.2 (34.86) | 20      | -8.35 (19.17) | .035 <sup>c</sup>    |
| ITT reduction in average pain >30% - missing imputed as no reduction >30% - No. (%) | 10         | 8 (44.4)      | 19      | 1 (5.0)       | .007 <sup>c</sup>    |
| Change in sleep score                                                               |            |               |         |               |                      |
| Per-protocol                                                                        | 13         | -0.86 (1.61)  | 18      | -0.64 (1.11)  | .657                 |
| ITT observed (complete cases)                                                       | 13         | -0.86 (1.61)  | 19      | -0.67 (1.09)  | .688                 |
| Change in number of rescue medications                                              |            |               |         |               |                      |
| Per-protocol                                                                        | 13         | -1.85 (3.43)  | 17      | -0.67 (2.22)  | .263                 |
| ITT observed (complete cases)                                                       | 13         | -1.85 (3.43)  | 18      | -0.68 (2.16)  | .253                 |
| Change in Beck Depression Inventory                                                 |            |               |         |               |                      |
| Per-protocol                                                                        | 14         | -2.07 (5.28)  | 18      | -3.00 (4.61)  | .600                 |
| ITT observed (complete cases)                                                       | 16         | -1.56 (5.32)  | 20      | -2.10 (5.42)  | .767                 |
| Change in SF-36 physical component score                                            |            |               |         |               |                      |
| Per-protocol                                                                        | 13         | 0.84 (5.77)   | 18      | 0.06 (5.19)   | .697                 |
| ITT observed (complete cases)                                                       | 15         | 0.74 (5.65)   | 20      | 0.22 (4.94)   | .774                 |

|                                        |    |             |    |             |      |
|----------------------------------------|----|-------------|----|-------------|------|
| Change in SF-36 mental component score |    |             |    |             |      |
| Per-protocol                           | 13 | 3.51 (9.26) | 18 | 2.44 (7.90) | .731 |
| ITT observed (complete cases)          | 15 | 3.39 (8.69) | 20 | 2.18 (7.52) | .664 |
| Subject global impression week 6       |    |             |    |             |      |
| Per-protocol                           | 13 | 4.77 (1.30) | 18 | 3.94 (1.16) | .074 |
| ITT observed (complete cases)          | 15 | 4.53 (1.55) | 20 | 3.70 (1.34) | .098 |

Abbreviation: ITT, intention-to-treat.

<sup>a</sup>Per-protocol population is subjects who completed the study per protocol through primary endpoint at week 6. ITT population includes all randomized patients.

<sup>b</sup>P values are from the *t* test for independent samples for continuous variables and the Fisher exact test for categorical variables.

<sup>c</sup>Statistically significant value.
